# Supplementary material
Source: PubMed Central journal article supplement (PMC4860283)
Supplement: NIHMS777757-supplement-Supplemental_Material.pdf [file NIHMS777757-supplement-Supplemental_Material.pdf]

## Supplemental Material

**Supplemental Table 1. Characteristics among Patients with Heart Failure from 2000 to 2010 (N = 2,492,425)**

| Year                  | 2000  | 2001  | 2002  | 2003  | 2004  | 2005  | 2006  | 2007  | 2008  | 2009  | 2010  | P <sub>linear trend</sub> | P <sub>overall X<sup>2</sup></sub> |
|-----------------------|-------|-------|-------|-------|-------|-------|-------|-------|-------|-------|-------|---------------------------|------------------------------------|
| N (Sample)            | 227K  | 228K  | 233K  | 244K  | 239K  | 230K  | 231K  | 215K  | 216K  | 214K  | 207K  | <0.0001                   |                                    |
| N (Weighted)          | 1114K | 1136K | 1128K | 1173K | 1157K | 1130K | 1135K | 1067K | 1064K | 1086K | 1037K |                           |                                    |
| CHF/100,000 US Census | 555   | 559   | 548   | 563   | 549   | 530   | 526   | 490   | 482   | 487   | 460   |                           |                                    |
| Sex (%)               |       |       |       |       |       |       |       |       |       |       |       |                           | <0.0001                            |
| Male                  | 44.7  | 45.1  | 45.5  | 46.1  | 47.2  | 48.1  | 48.7  | 48.9  | 49.2  | 49.7  | 50.1  | <0.0001                   |                                    |
| Female                | 55.4  | 54.9  | 54.5  | 53.9  | 52.7  | 51.9  | 51.3  | 51.1  | 50.8  | 50.3  | 49.9  | <0.0001                   |                                    |
| Age (%)               |       |       |       |       |       |       |       |       |       |       |       |                           | <0.0001                            |
| <60                   | 16.8  | 16.5  | 17.5  | 18.1  | 18.7  | 18.6  | 19.7  | 19.9  | 19.0  | 19.4  | 19.9  | <0.0001                   |                                    |
| 60-69                 | 17.8  | 17.0  | 17.1  | 17.6  | 17.6  | 17.0  | 16.9  | 17.5  | 17.3  | 17.7  | 17.7  | 0.0001                    |                                    |
| 70-79                 | 29.8  | 29.6  | 29.0  | 28.1  | 27.4  | 26.5  | 25.5  | 24.9  | 24.5  | 24.2  | 23.4  | 0.0001                    |                                    |
| ≥80                   | 35.6  | 36.8  | 36.4  | 36.2  | 36.3  | 37.9  | 37.8  | 37.6  | 39.2  | 38.7  | 39.0  | 0.0001                    |                                    |
| Race (%)              |       |       |       |       |       |       |       |       |       |       |       |                           | <0.0001                            |
| White                 | 72.9  | 73.0  | 70.3  | 68.3  | 68.6  | 72.5  | 67.7  | 66.4  | 68.9  | 67.8  | 65.7  | <0.0001                   |                                    |
| Black                 | 16.7  | 16.4  | 18.4  | 18.5  | 19.7  | 15.7  | 19.23 | 20.8  | 18.7  | 19.1  | 22.1  | <0.0001                   |                                    |
| Asian                 | 6.8   | 7.3   | 7.5   | 9.5   | 7.9   | 8.1   | 9.0   | 8.1   | 7.2   | 7.7   | 7.6   | <0.0001                   |                                    |
| AI/NA                 | 0.2   | 0.3   | 0.2   | 0.2   | 0.4   | 0.3   | 0.6   | 0.7   | 0.7   | 0.5   | 0.7   | <0.0001                   |                                    |

|                                                                                                                                            |               |               |               |               |               |               |               |               |               |               |               |         |         |
|--------------------------------------------------------------------------------------------------------------------------------------------|---------------|---------------|---------------|---------------|---------------|---------------|---------------|---------------|---------------|---------------|---------------|---------|---------|
| Other                                                                                                                                      | 1.8           | 1.5           | 1.9           | 1.8           | 1.7           | 2.0           | 1.7           | 2.2           | 2.6           | 3.0           | 2.0           | -       |         |
| Ethnicity (%)                                                                                                                              |               |               |               |               |               |               |               |               |               |               |               |         | <0.0001 |
| Non-Hispanic                                                                                                                               | 94.7          | 94.5          | 94.6          | 93.0          | 94.2          | 94.1          | 93.4          | 94.0          | 94.2          | 93.4          | 93.1          | <0.0001 |         |
| Hispanic                                                                                                                                   | 5.3           | 5.5           | 5.4           | 7.0           | 5.8           | 5.9           | 6.6           | 6.0           | 5.8           | 6.6           | 6.9           | <0.0001 |         |
| Prevalence of T2DM (%)                                                                                                                     | 38.9          | 39.7          | 40.6          | 40.7          | 40.4          | 40.3          | 40.4          | 41.5          | 41.1          | 41.8          | 41.9          | <0.0001 |         |
| Elixhauser's comorbidities index                                                                                                           |               |               |               |               |               |               |               |               |               |               |               |         |         |
| Mean (SE)                                                                                                                                  | 3.3<br>(0.04) | 3.5<br>(0.04) | 3.7<br>(0.05) | 4.9<br>(0.06) | 5.4<br>(0.07) | 5.9<br>(0.08) | 6.7<br>(0.09) | 6.7<br>(0.09) | 5.1<br>(0.05) | 5.5<br>(0.06) | 5.7<br>(0.07) | <0.0001 |         |
| N = numbers, CHF = Congestive Heart Failure, AI/NA = American Indian/Native Alaskan , T2DM = Type 2 Diabetes mellitus, SE = Standard error |               |               |               |               |               |               |               |               |               |               |               |         |         |

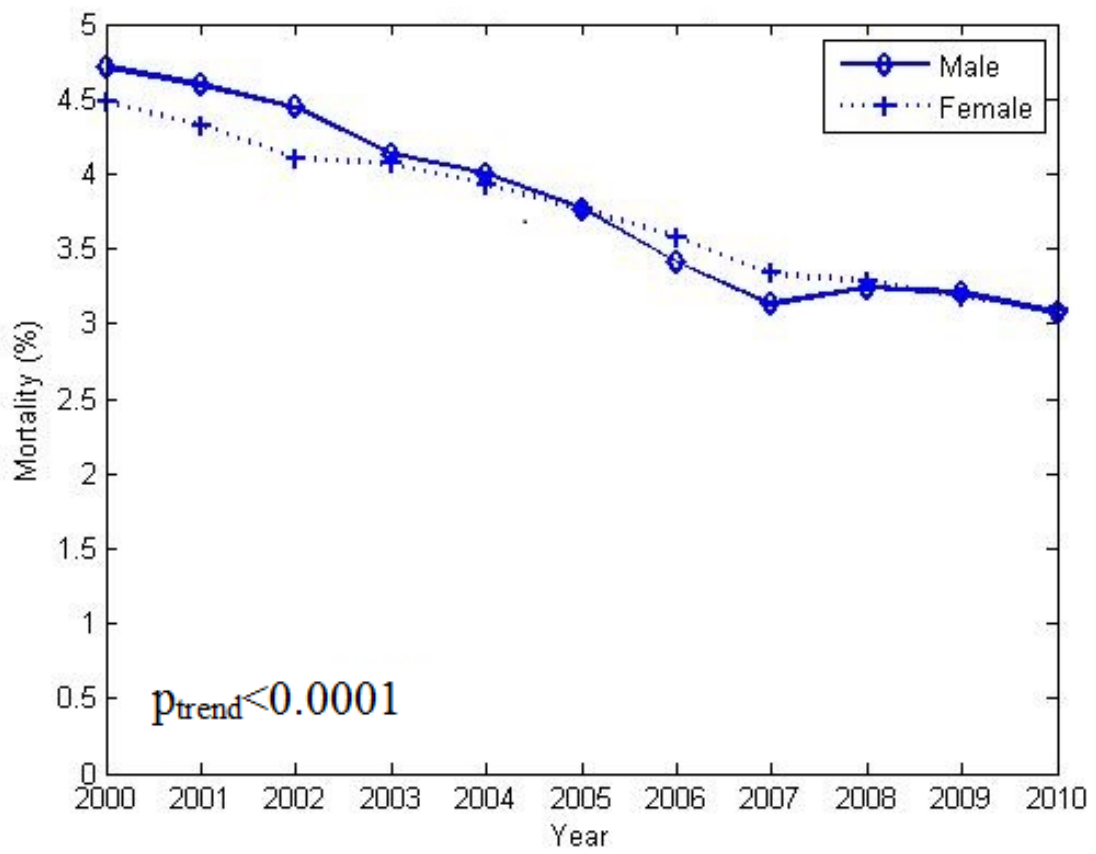

## Supplemental Figure Legend

**Supplemental Figure 1.** Decrease in age-standardized in-hospital mortality rate among men and women with heart failure, 2000-2010.  $P_{\text{linear trend}} < 0.0001$
